## Correction: Non-invasive *in vivo* molecular imaging of intra-articularly transplanted immortalized bone marrow stem cells for osteoarthritis treatment

**Bou-Yue Peng<sup>1,2</sup>, Chi-Sheng Chiou<sup>2,3</sup>, Navneet Kumar Dubey<sup>4,5</sup>, Sung-Hsun Yu<sup>4,6</sup>, Yue-Hua Deng<sup>4,7</sup>, Feng-Chou Tsai<sup>8</sup>, Han-Sun Chiang<sup>7</sup>, Ying-Hua Shieh<sup>10,11</sup>, Wei-Hong Chen<sup>4</sup> and Win-Ping Deng<sup>2,4,9</sup>**

<sup>1</sup> Oral and Maxillofacial Surgery Section, Department of Dentistry, Taipei Medical University Hospital, Taipei, Taiwan

<sup>2</sup> School of Dentistry, College of Oral Medicine, Taipei Medical University, Taipei, Taiwan

<sup>3</sup> Division of Allergy, Immunology and Rheumatology, Department of Internal Medicine, Taipei Medical University Hospital, Taipei, Taiwan

<sup>4</sup> Stem Cell Research Center, College of Oral Medicine, Taipei Medical University, Taipei, Taiwan

<sup>5</sup> Graduate Institute of Biomedical Materials and Tissue Engineering, College of Biomedical Engineering, Taipei Medical University, Taipei, Taiwan

<sup>6</sup> Graduate Institute of Medical Sciences, College of Medicine, Taipei Medical University, Taipei, Taiwan

<sup>7</sup> Department of Life Science, Fu Jen Catholic University, Taipei, Taiwan

<sup>8</sup> Department of Stem Cell Research, Cosmetic Clinic Group, Taipei, Taiwan

<sup>9</sup> Graduate Institute of Basic Medicine, Fu Jen Catholic University, Taipei, Taiwan

<sup>10</sup> Department of Family Medicine, School of Medicine, College of Medicine, Taipei Medical University, Taipei, Taiwan

<sup>11</sup> Department of Family Medicine, Taipei Medical University Hospital, Taipei, Taiwan

**Published:** May 18, 2018

**Copyright:** Peng et al. This is an open-access article distributed under the terms of the Creative Commons Attribution License 3.0 (CC BY 3.0), which permits unrestricted use, distribution, and reproduction in any medium, provided the original author and source are credited.

**This article has been corrected:** The 2nd affiliation is added to the author given below:

**Bou-Yue Peng<sup>1,2</sup>**

Original article: Oncotarget. 2017; 8:97153-97164. <https://doi.org/10.18632/oncotarget.21315>
